# Supplementary material
Source: bioRxiv or medRxiv preprint supplement (https://medrxiv.org/highwire/filestream/90742/field_highwire_adjunct_files/1/2020.07.23.20160721-2.pdf)
Supplement: Supplementary file [file 2020.07.23.20160721-2.pdf]

**Evidence of integrated health service delivery during COVID-19 in low- and middle-income countries:  
protocol for a scoping review**

*Supplemental Material*

## Supplement 1: PubMed literature search script for low and low-middle-income countries

| Search Theme                    | Search Script for PubMed                                                                                                                                                                                                                                                                                                                                                                                                                                                                                                                                                                                                                                                                                                                                                                                                                                                                                                                                                                                                                                                                                                                                                                                                                                                                                                                                                                                                                                                                                                                                                                                                                                                                                                                                                                                                                                                                                                                                                                                                                                                                                                                                                                                                                                                                                                                                                                                                                                                                                                                                                                                                                                                                                                                                                                                                                                                                                                                                                                                                                                                                                                                                                                                                                                                                                      |
|---------------------------------|---------------------------------------------------------------------------------------------------------------------------------------------------------------------------------------------------------------------------------------------------------------------------------------------------------------------------------------------------------------------------------------------------------------------------------------------------------------------------------------------------------------------------------------------------------------------------------------------------------------------------------------------------------------------------------------------------------------------------------------------------------------------------------------------------------------------------------------------------------------------------------------------------------------------------------------------------------------------------------------------------------------------------------------------------------------------------------------------------------------------------------------------------------------------------------------------------------------------------------------------------------------------------------------------------------------------------------------------------------------------------------------------------------------------------------------------------------------------------------------------------------------------------------------------------------------------------------------------------------------------------------------------------------------------------------------------------------------------------------------------------------------------------------------------------------------------------------------------------------------------------------------------------------------------------------------------------------------------------------------------------------------------------------------------------------------------------------------------------------------------------------------------------------------------------------------------------------------------------------------------------------------------------------------------------------------------------------------------------------------------------------------------------------------------------------------------------------------------------------------------------------------------------------------------------------------------------------------------------------------------------------------------------------------------------------------------------------------------------------------------------------------------------------------------------------------------------------------------------------------------------------------------------------------------------------------------------------------------------------------------------------------------------------------------------------------------------------------------------------------------------------------------------------------------------------------------------------------------------------------------------------------------------------------------------------------|
| Low and middle-income countries | ((Deprived Countries[tw] OR Deprived Population[tw] OR Deprived Populations[tw] OR Developing Countries[tw] OR Developing Country[tw] OR Developing Economies[tw] OR Developing Economy[tw] OR Developing Nation[tw] OR Developing Nations[tw] OR Developing Population[tw] OR Developing Populations[tw] OR Developing World[tw] OR LAMI Countries[tw] OR LAMI Country[tw] OR Less Developed Countries[tw] OR Less Developed Country[tw] OR Less Developed Economies [tw] OR Less Developed Nation[tw] OR Less Developed Nations[tw] OR Less Developed World[tw] OR Lesser Developed Countries[tw] OR Lesser Developed Nations[tw] OR LMIC[tw] OR LMICS[tw] OR Low GDP[tw] OR Low GNP[tw] OR Low Gross Domestic[tw] OR Low Gross National[tw] OR Low Income Countries[tw] OR Low Income Country[tw] OR Low Income Economies [tw] OR Low Income Economy[tw] OR Low Income Nations[tw] OR Low Income Population[tw] OR Low Income Populations[tw] OR Lower GDP[tw] OR lower gross domestic[tw] OR Lower Income Countries[tw] OR Lower Income Country[tw] OR Lower Income Nations[tw] OR Lower Income Population[tw] OR Lower Income Populations[tw] OR Middle Income Countries[tw] OR Middle Income Country[tw] OR Middle Income Economies [tw] OR Middle Income Nation[tw] OR Middle Income Nations[tw] OR Middle Income Population[tw] OR Middle Income Populations[tw] OR Poor Countries[tw] OR Poor Country[tw] OR Poor Economies [tw] OR Poor Economy[tw] OR Poor Nation[tw] OR Poor Nations[tw] OR Poor Population[tw] OR Poor Populations[tw] OR poor world[tw] OR Poorer Countries[tw] OR Poorer Economies [tw] OR Poorer Economy[tw] OR Poorer Nations[tw] OR Poorer Population[tw] OR Poorer Populations[tw] OR Third World[tw] OR Transitional Countries[tw] OR Transitional Country[tw] OR Transitional Economies[tw] OR Transitional Economy[tw] OR Under Developed Countries[tw] OR Under Developed Country[tw] OR under developed nations[tw] OR Under Developed World[tw] OR Under Served Population[tw] OR Under Served Populations[tw] OR Underdeveloped Countries[tw] OR Underdeveloped Country[tw] OR underdeveloped economies[tw] OR underdeveloped nations[tw] OR underdeveloped population[tw] OR Underdeveloped World[tw] OR Underserved Countries[tw] OR Underserved Nations[tw] OR Underserved Population[tw] OR Underserved Populations[tw]) OR (Afghanistan[tw] OR Angola[tw] OR Bangladesh[tw] OR Benin[tw] OR Bhutan[tw] OR Bolivia[tw] OR Burma[tw] OR “Burkina Faso”[tw] OR Burundi[tw] OR “Cabo Verde”[tw] OR “Cape verde”[tw] OR Cambodia[tw] OR Cameroon[tw] OR “Central African Republic”[tw] OR Chad[tw] OR Comoros[tw] OR Comores[tw] OR Comoro[tw] OR Congo[tw] OR “Côte d'Ivoire”[tw] OR Djibouti[tw] OR Egypt[tw] OR “El Salvador”[tw] OR Eritrea[tw] OR Ethiopia[tw] OR Gambia[tw] OR Gaza[tw] OR Ghana[tw] OR Guinea[tw] OR “Guinea Bissau”[tw] OR Haiti[tw] OR Honduras[tw] OR India[tw] OR Indonesia[tw] OR Kenya[tw] OR Kiribati[tw] OR Kyrgyz[tw] OR Kirghizia[tw] OR Kirghiz[tw] OR Kirgizstan[tw] OR Kyrgyzstan[tw] OR “Lao PDR”[tw] OR Laos[tw] OR Lesotho[tw] OR Liberia[tw] OR Madagascar[tw] OR Malawi[tw] OR Mali[tw] OR Mauritania[tw] OR Micronesia[tw] OR Moldova[tw] OR Mongolia[tw] OR Morocco[tw] OR Mozambique[tw] OR Myanmar[tw] OR Nepal[tw] OR |

Nicaragua[tw] OR Niger[tw] OR Nigeria [tw] OR Pakistan [tw] OR Palau[tw] OR Panama[tw] OR “Papua New Guinea”[tw] OR Philippines[tw] OR Phillippines[tw] OR Philipines[tw] OR Phillipines[tw] OR Principe[tw] OR Rwanda[tw] OR Ruanda[tw] OR “Sao Tome”[tw] OR Senegal[tw] OR “Sierra Leone”[tw] OR “Solomon Islands”[tw] OR Somalia[tw] OR “South Sudan”[tw] OR Sudan[tw] OR Swaziland[tw] OR Syria[tw] OR “Syrian Arab Republic”[tw] OR Tajikistan[tw] OR TadzhiKistan[tw] OR Tadjikistan[tw] OR TadzhiK[tw] OR Tanzania[tw] OR Timor[tw] OR Togo[tw] OR Tunisia[tw] OR Uganda[tw] OR Ukraine[tw] OR Uzbek[tw] OR Uzbekistan[tw] OR Vanuatu[tw] OR Vietnam[tw] OR “West Bank”[tw] OR Yemen[tw] OR Zambia[tw] OR Zimbabwe[tw]))

*Note: The World Bank developed the list of low-income economies and the lower-middle-income economies according to the World Bank Atlas method using GNI per capita.*

*(<https://datahelpdesk.worldbank.org/knowledgebase/articles/378832-what-is-the-world-bank-atlas-method>)*

*Low-income economies = GNI per capita \$1,025 or less in 2018*

*Lower middle-income economies = GNI per capita between \$1,026 and \$3,995 in 2018*

## Supplemental Material 2: Description of the data extraction form

| Extracted data                      | Description of the data needs to be extracted                                                                                                                                                                                                    |
|-------------------------------------|--------------------------------------------------------------------------------------------------------------------------------------------------------------------------------------------------------------------------------------------------|
| <b><i>Study characteristics</i></b> |                                                                                                                                                                                                                                                  |
| Article Number                      | Assigned number of the article                                                                                                                                                                                                                   |
| Database ID                         | ID in the repository or database                                                                                                                                                                                                                 |
| Article                             | Article type                                                                                                                                                                                                                                     |
| Source                              | Name of the repository or database                                                                                                                                                                                                               |
| Title                               | Title of the articles                                                                                                                                                                                                                            |
| Authors                             | Author of the article/report/document                                                                                                                                                                                                            |
| Year                                | Year of publication                                                                                                                                                                                                                              |
| Country name                        | Name of the country/countries where the study/studies were conducted or the integration mechanisms were described or where there is stated relevance of the recommendations                                                                      |
| Country Type                        | <ul style="list-style-type: none"> <li>• Low-income economies: GDP \$1,025 or less (n = 31)</li> <li>• Lower-middle income economies: GDP \$1,026 to \$3,995 (n = 47)</li> </ul>                                                                 |
| WHO region                          | <ul style="list-style-type: none"> <li>• African Region</li> <li>• Region of the Americas</li> <li>• South-East Asia Region</li> <li>• European Region</li> <li>• Eastern Mediterranean Region, and</li> <li>• Western Pacific Region</li> </ul> |
| Study populations                   | If applicable                                                                                                                                                                                                                                    |
| Study location                      | Urban or Rural                                                                                                                                                                                                                                   |

| <b>Extracted data</b>                                                 | <b>Description of the data needs to be extracted</b>                                                                                                                                                                                                                                                                                                                                                                                                                                                                                                                                                                                                                                                                                                                                                                                                                      |
|-----------------------------------------------------------------------|---------------------------------------------------------------------------------------------------------------------------------------------------------------------------------------------------------------------------------------------------------------------------------------------------------------------------------------------------------------------------------------------------------------------------------------------------------------------------------------------------------------------------------------------------------------------------------------------------------------------------------------------------------------------------------------------------------------------------------------------------------------------------------------------------------------------------------------------------------------------------|
| Study design and methodology                                          | <ul style="list-style-type: none"> <li>• Observational studies (qualitative, quantitative, mixed-method, case studies)</li> <li>• Intervention or experimental studies</li> <li>• Methodological report</li> <li>• Systemic review or scoping review</li> <li>• Commentary, editorial or personal narrative or review</li> <li>• Government document or programmatic document</li> <li>• Personal communication</li> </ul>                                                                                                                                                                                                                                                                                                                                                                                                                                                |
| Study framework(s) and/or theories                                    | If applicable                                                                                                                                                                                                                                                                                                                                                                                                                                                                                                                                                                                                                                                                                                                                                                                                                                                             |
| <b><i>Dimensions of Integrated Care and Pandemic Preparedness</i></b> |                                                                                                                                                                                                                                                                                                                                                                                                                                                                                                                                                                                                                                                                                                                                                                                                                                                                           |
| Definition of integrated care                                         | <ul style="list-style-type: none"> <li>• How integrated health service delivery is defined (if directly mentioned in the article)</li> </ul>                                                                                                                                                                                                                                                                                                                                                                                                                                                                                                                                                                                                                                                                                                                              |
| Pandemic phase when IHSD implemented                                  | <ul style="list-style-type: none"> <li>• Interpandemic</li> <li>• Alert</li> <li>• Pandemic</li> <li>• Transition</li> </ul>                                                                                                                                                                                                                                                                                                                                                                                                                                                                                                                                                                                                                                                                                                                                              |
| • IHSD related risk assessment                                        | <ul style="list-style-type: none"> <li>• Preparedness</li> <li>• Response</li> <li>• Recovery</li> </ul>                                                                                                                                                                                                                                                                                                                                                                                                                                                                                                                                                                                                                                                                                                                                                                  |
| Typologies of integration                                             | <ul style="list-style-type: none"> <li>• Organizational: Integration of organizations are brought together formally by mergers or through 'collectives' the virtually through coordinated provider networks or via contacts between separate organizations brokered by the purchaser</li> <li>• Functional: Integration of non-clinical support and back-office functions, such as electronic patient records</li> <li>• Service: Integration of different clinical services at an organizational level, such as through teams of multidisciplinary professionals</li> <li>• Clinical: Integration of care delivered by professional and providers to patients into a single or coherent process within and/or across professions, such as through the use of shared guidelines and protocols</li> <li>• Mixed: Combination of two or more type above: Specify</li> </ul> |
| Type of service integration (if applicable)                           | <ul style="list-style-type: none"> <li>• Specific service name / disease focus OR</li> <li>• None</li> </ul>                                                                                                                                                                                                                                                                                                                                                                                                                                                                                                                                                                                                                                                                                                                                                              |
| Mechanism of integration (if applicable)                              | <ul style="list-style-type: none"> <li>• Normative: based on shared values for coordination and collaboration</li> <li>• Systematic: coherence of rules and policies at various levels of the Organisation</li> </ul>                                                                                                                                                                                                                                                                                                                                                                                                                                                                                                                                                                                                                                                     |

| <b>Extracted data</b>                                                       | <b>Description of the data needs to be extracted</b>                                                                                                                                                                                                                                                                                                |
|-----------------------------------------------------------------------------|-----------------------------------------------------------------------------------------------------------------------------------------------------------------------------------------------------------------------------------------------------------------------------------------------------------------------------------------------------|
| Structure of integration (if applicable)                                    | <ul style="list-style-type: none"> <li>• Horizontal: integration occurring across operating units and/or organizations that are at the same stage in the process of delivering services come together</li> <li>• Vertical: brings together organizations at different levels of the hierarchical structure under one management umbrella</li> </ul> |
| Intensity of integration (if applicable)                                    | <ul style="list-style-type: none"> <li>• Full integration: Process of integrating different component of the health system using a new organizational model</li> <li>• Partial integration: Process of creating non-binding linkages or ties support integration between health system to improve coordination between them</li> </ul>              |
| Incentives for integration (if applicable)                                  | <ul style="list-style-type: none"> <li>• Any monetary or non-monetary incentives for integration targeted at any actors in the health system</li> </ul>                                                                                                                                                                                             |
| Timing of integration (if applicable)                                       | <ul style="list-style-type: none"> <li>• Prior to COVID-19's emergence</li> <li>• In preparation for COVID-19</li> <li>• During COVID-19</li> <li>• After COVID-19 cases had declined in the study area</li> </ul>                                                                                                                                  |
| Organizational and operational components                                   | <ul style="list-style-type: none"> <li>• Program design</li> <li>• Policy options used</li> <li>• Level/s of health systems integrated</li> <li>• Implementation strategy</li> </ul>                                                                                                                                                                |
| <b><i>Intersection with COVID-19</i></b>                                    |                                                                                                                                                                                                                                                                                                                                                     |
| Provided details on COVID-19 pandemic specific to a country (if applicable) | <ul style="list-style-type: none"> <li>• Dates of pandemic in specified country</li> <li>• Reported cases (absolute number and per capita)</li> <li>• Reported deaths</li> <li>• Details on health systems capacity during COVID-19 (e.g. beds occupied)</li> </ul>                                                                                 |
| Facilitators of integration                                                 | <ul style="list-style-type: none"> <li>• Reported facilitators</li> </ul>                                                                                                                                                                                                                                                                           |
| Barriers of integration                                                     | <ul style="list-style-type: none"> <li>• Reported barriers or challenges</li> </ul>                                                                                                                                                                                                                                                                 |
| 'Positive' effects of integration                                           | <ul style="list-style-type: none"> <li>• Can be reported as improvements in inputs, processes, outputs, or outcomes.</li> <li>• Both quantified and qualitative effects should be recorded</li> </ul>                                                                                                                                               |
| Negative consequences of integration                                        | <ul style="list-style-type: none"> <li>• Can be reported as negative impacts on inputs, processes, outputs, or outcomes</li> <li>• Both quantified and qualitative effects should be recorded</li> </ul>                                                                                                                                            |
| Recommendations – COVID-19 specific                                         | <ul style="list-style-type: none"> <li>• Preparedness recommendations</li> <li>• Response recommendations</li> <li>• Recovery recommendations</li> </ul>                                                                                                                                                                                            |

---

| <b>Extracted data</b>                                   | <b>Description of the data needs to be extracted</b>                                                                                                                                                                                            |
|---------------------------------------------------------|-------------------------------------------------------------------------------------------------------------------------------------------------------------------------------------------------------------------------------------------------|
| Recommendations – health system (non-COVID-19 specific) | <ul style="list-style-type: none"><li>• Related to future pandemics/epidemics</li><li>• Related to essential services during pandemics/epidemics</li><li>• Related to the health system when there is not an active pandemic/epidemic</li></ul> |

---
